# Supplementary material
Source: HighWire-hosted journal article supplement (doi:10.1101/rna.056259.116)
Supplement: Supplemental_Legends.docx [file Supplemental_Legends.docx]

**Supp Table 1**. Percent C32 misincorporations in different *S. pombe* strains. Trm140 and Trm141 targets are orange and green, respectively.

**Supp Table 2**. Top hits from BLAST analysis of Trm140 and Trm141 sequences against the different species indicated in the various sheets of the excel file. The total score, query name, e-value and % identity from the Trm140 and Trm141 BLAST analyses are indicated. For each species, the table provides a combined list of BLAST analysis with either Trm140 or Trm141 sequences as indicated above the columns. The tables were sorted based on the e-value obtained from the Trm140 BLAST. If a protein was a hit in only one BLAST analysis, that shows “NA” value for other protein.
