# Supplementary material
Source: HighWire-hosted journal article supplement (doi:10.1101/rna.056259.116)
Supplement: Supplemental_Table_1.xlsx [file Supplemental_Table_1.xlsx]

## Sheet: % misincorporation
tRNA	WT	trm141∆	trm140∆
ArgACG	0.105152	0.0129172	0.0329973
PheGAA	0.134311	0.0320295	0.0122285
TyrGTA	0.157948	0.0778369	0.0905407
IleAAT	0.163087	0.0780664	0.0424061
AsnGTT	0.168924	0.0808349	0.0630903
LeuCAA	0.187299	0.100014	0.0908151
AspGTC	0.2096	0.046032	0.0445741
LysCTT	0.22208	0.0835835	0.07897
IleTAT	0.290299	0.161482	0.0727539
MetCAT	0.39077	0.0800525	0.0693998
GluCTC	0.470862	0.120366	0.15598
ArgTCT	0.545449	0.218972	0.204508
GluTTC	0.629074	0.333688	0.258149
GlyTCC	0.86667	0.227875	0.212786
LysTTT	0.871233	0.209602	0.267366
SerAGA	11.634	0.0194184	6.90987
SerCGA	38.5144	0.104755	23.8488
SerTGA	42.4253	0.105315	20.0659
ThrCGT	60.2461	66.4579	0.0704198
ThrAGT	60.8817	34.8148	0.0378322
ThrTGT	64.3124	65.4742	0.210612
SerGCT	64.5639	0.126273	57.1259
