# Supplementary material
Source: HighWire-hosted journal article supplement (doi:10.1101/rna.056259.116)
Supplement: Supplemental_Table_2.xlsx [file Supplemental_Table_2.xlsx]

## Sheet: Guide for the tables
Hits from Trm140 BLASTp	BLASTp values with Trm140p as query
Hits from Trm141 BLASTp	BLASTp values with Trm141p as query
Accession	Accession number of hits from BLASTp analysis
Description	Discription of hits from BLASTp analysis
Total.score	Total score of hits from BLASTp analysis
Query.cover	Query cover of hits from BLASTp analysis
E.value	E value of hits from BLASTp analysis
Ident	Percentage identity of hits from BLASTp analysis with query sequence

## Sheet: H. sapiens
		Hits from Trm140 BLASTp				Hits from Trm141 BLASTp
Accession	Description	Total.score	Query.cover	E.value	Ident	Total.score	Query.cover	E.value	Ident
BAG61786.1	unnamed protein product [Homo sapiens]	199	0.67	1e-60	0.48	126	0.76	1e-33	0.38	METTL2B
AAH06985.1	Methyltransferase like 2A [Homo sapiens]	198	0.67	2e-60	0.48	127	0.76	9e-34	0.38	METTL2A
BAB14260.1	unnamed protein product [Homo sapiens]	198	0.67	2e-60	0.48	127	0.76	1e-33	0.38	METTL2A
BAA92136.1	unnamed protein product [Homo sapiens]	236	0.75	3e-59	0.48	166	0.86	6e-33	0.38	METTL2B
EAW94351.1	hCG1735238, isoform CRA_a [Homo sapiens]	236	0.75	5e-59	0.48	167	0.86	4e-33	0.38	METTL2B
AAI21117.1	METTL2B protein [Homo sapiens]	270	0.88	1e-58	0.51	165	0.86	2e-32	0.38	METTL2B
AAH64929.1	METTL2B protein [Homo sapiens]	270	0.88	2e-58	0.51	166	0.86	2e-32	0.38	METTL2B
BAG63980.1	unnamed protein product [Homo sapiens]	270	0.88	2e-58	0.51	166	0.86	2e-32	0.38	METTL2B
NP_060866.2	methyltransferase-like protein 2B [Homo sapiens]	270	0.88	2e-58	0.51	165	0.86	3e-32	0.38	METTL2B
EAW94353.1	hCG1735238, isoform CRA_c [Homo sapiens]	269	0.88	3e-58	0.51	166	0.86	1e-32	0.38	METTL2B
NP_859076.3	methyltransferase-like protein 2A [Homo sapiens]	269	0.88	3e-58	0.51	166	0.86	1e-32	0.38	METTL2A
AAF28944.1	HSPC266 [Homo sapiens]	268	0.88	7e-58	0.51	165	0.86	3e-32	0.38	METTL2A
NP_689609.2	methyltransferase-like protein 6 isoform 1 [Homo sapiens]	184	0.74	2e-54	0.41	188	0.97	9e-57	0.43	METTL6
XP_006712827.1	PREDICTED: methyltransferase-like protein 8 isoform X4 [Homo sapiens]	240	0.85	3e-54	0.49	171	0.93	5e-32	0.36	METTL8
XP_006712828.1	PREDICTED: methyltransferase-like protein 8 isoform X5 [Homo sapiens]	235	0.85	3e-54	0.49	171	0.93	4e-32	0.36	METTL8
BAF84797.1	unnamed protein product [Homo sapiens]	260	0.91	1e-53	0.49	170	0.93	1e-31	0.36	METTL8
NP_079046.2	methyltransferase-like protein 8 [Homo sapiens]	260	0.91	1e-53	0.49	171	0.93	7e-32	0.36	METTL8
XP_006712825.1	PREDICTED: methyltransferase-like protein 8 isoform X2 [Homo sapiens]	260	0.91	5e-53	0.49	171	0.93	1e-31	0.36	METTL8
AAH22400.1	METTL6 protein [Homo sapiens]	175	0.69	2e-51	0.41	181	0.91	2e-54	0.43	METTL6
NP_001288719.1	methyltransferase-like protein 6 isoform 2 [Homo sapiens]	127	0.74	2e-33	0.34	117	0.97	5e-30	0.33
XP_011510177.1	PREDICTED: methyltransferase-like protein 8 isoform X3 [Homo sapiens]	130	0.91	3e-33	0.33	130	0.58	6e-06	0.54
BAG50845.1	unnamed protein product [Homo sapiens]	117	0.32	5e-31	0.58	52	0.39	9e-08	0.32
NP_001288721.1	methyltransferase-like protein 6 isoform 4 [Homo sapiens]	117	0.44	5e-30	0.39	135	0.58	2e-37	0.46
XP_011531659.1	PREDICTED: methyltransferase-like protein 6 isoform X5 [Homo sapiens]	116	0.44	1e-29	0.39	134	0.58	7e-37	0.46
XP_006713035.1	PREDICTED: methyltransferase-like protein 6 isoform X3 [Homo sapiens]	116	0.44	2e-29	0.39	134	0.58	1e-36	0.46
NP_001288720.1	methyltransferase-like protein 6 isoform 3 [Homo sapiens]	116	0.44	3e-29	0.39	134	0.58	1e-36	0.46
XP_005264927.1	PREDICTED: methyltransferase-like protein 6 isoform X2 [Homo sapiens]	115	0.44	8e-29	0.39	134	0.58	2e-36	0.46
BAB71574.1	unnamed protein product [Homo sapiens]	112	0.44	6e-28	0.38	132	0.58	1e-35	0.46
Q9H825.2	RecName: Full=Methyltransferase-like protein 8	141	0.58	2e-14	0.35	126	0.52	1e-16	0.42
XP_011531658.1	PREDICTED: methyltransferase-like protein 6 isoform X4 [Homo sapiens]	140	0.6	6e-14	0.41	112	0.97	2e-28	0.33
EAW83659.1	hCG2014313, isoform CRA_c [Homo sapiens]	71.6	0.27	7e-14	0.38	38.9	0.12	0.012	0.55
EAW83658.1	hCG2014313, isoform CRA_b [Homo sapiens]	70.5	0.27	1e-13	0.38	37.7	0.12	0.022	0.55
AAF28945.1	HSPC267 [Homo sapiens]	68.9	0.27	6e-13	0.38	37.4	0.12	0.031	0.55
AAX93284.1	unknown [Homo sapiens]	109	0.41	4e-12	0.36	126	0.52	8e-17	0.42
BAB14797.1	unnamed protein product [Homo sapiens]	115	0.52	7e-12	0.36	126	0.52	9e-17	0.42
XP_005271787.1	PREDICTED: alkylated DNA repair protein alkB homolog 8 isoform X2 [Homo sapiens]	46.2	0.59	0.0001	0.23	NA	NA	NA	NA
BAG60935.1	unnamed protein product [Homo sapiens]	46.2	0.59	0.0002	0.23	NA	NA	NA	NA
NP_001287939.1	alkylated DNA repair protein alkB homolog 8 isoform 1 [Homo sapiens]	45.4	0.59	0.0002	0.23	NA	NA	NA	NA
NP_620130.2	alkylated DNA repair protein alkB homolog 8 isoform 2 [Homo sapiens]	45.8	0.59	0.0002	0.23	NA	NA	NA	NA
XP_005271785.1	PREDICTED: alkylated DNA repair protein alkB homolog 8 isoform X1 [Homo sapiens]	46.2	0.59	0.0002	0.23	NA	NA	NA	NA
NP_006160.1	nicotinamide N-methyltransferase [Homo sapiens]	42.4	0.52	0.002	0.24	33.9	0.35	0.55	0.26
AAF20268.1	NA	NA	NA	NA	NA	42.7	0.45	0.0006	0.26
BAB14913.1	NA	NA	NA	NA	NA	42	0.45	0.001	0.26
CAB43300.1	NA	NA	NA	NA	NA	42	0.45	0.001	0.26
EAW83657.1	NA	NA	NA	NA	NA	39.3	0.12	0.003	0.55
NP_054752.3	NA	NA	NA	NA	NA	42	0.45	0.001	0.26

## Sheet: P. troglodytes
		Hits from Trm140 BLASTp				Hits from Trm141 BLASTp
Accession	Description	Total.score	Query.cover	E.value	Ident	Total.score	Query.cover	E.value	Ident
XP_009442014.1	PREDICTED: methyltransferase-like protein 8 isoform X2 [Pan troglodytes]	203	0.91	1e-61	0.38	126	0.79	4e-17	0.31
XP_001144324.1	PREDICTED: methyltransferase-like protein 2A [Pan troglodytes]	271	0.92	5e-59	0.51	165	0.86	6e-33	0.38
XP_009452432.1	PREDICTED: methyltransferase-like protein 2B [Pan troglodytes]	267	0.88	7e-58	0.5	164	0.86	2e-32	0.38
XP_009442016.1	PREDICTED: methyltransferase-like protein 8 isoform X3 [Pan troglodytes]	241	0.85	5e-55	0.49	170	0.93	3e-32	0.36
XP_001159583.1	PREDICTED: methyltransferase-like protein 6 isoform X1 [Pan troglodytes]	184	0.74	7e-55	0.41	186	0.97	1e-56	0.42
XP_001142367.1	PREDICTED: methyltransferase-like protein 8 isoform X1 [Pan troglodytes]	261	0.91	3e-54	0.49	171	0.93	4e-32	0.36
XP_009423224.1	PREDICTED: LOW QUALITY PROTEIN: methyltransferase-like protein 2 [Pan troglodytes]	167	0.6	7e-49	0.46	115	0.76	3e-30	0.35
XP_009442017.1	PREDICTED: methyltransferase-like protein 8 isoform X4 [Pan troglodytes]	131	0.91	1e-34	0.33	129	0.58	2e-06	0.51
XP_003309692.1	PREDICTED: methyltransferase-like protein 6 isoform X4 [Pan troglodytes]	127	0.74	7e-34	0.34	115	0.97	5e-30	0.32
XP_009443233.1	PREDICTED: methyltransferase-like protein 6 isoform X6 [Pan troglodytes]	117	0.44	1e-30	0.39	135	0.58	5e-38	0.46
XP_009443232.1	PREDICTED: methyltransferase-like protein 6 isoform X5 [Pan troglodytes]	116	0.44	5e-30	0.39	134	0.58	3e-37	0.46
XP_009443230.1	PREDICTED: methyltransferase-like protein 6 isoform X2 [Pan troglodytes]	116	0.44	6e-30	0.39	134	0.58	3e-37	0.46
XP_009443231.1	PREDICTED: methyltransferase-like protein 6 isoform X3 [Pan troglodytes]	114	0.44	2e-29	0.39	134	0.58	4e-37	0.46
XP_001137322.1	PREDICTED: alkylated DNA repair protein alkB homolog 8 isoform X2 [Pan troglodytes]	44.3	0.59	0.0001	0.23	NA	NA	NA	NA
XP_522172.3	PREDICTED: alkylated DNA repair protein alkB homolog 8 isoform X1 [Pan troglodytes]	44.7	0.59	0.0001	0.23	NA	NA	NA	NA
XP_001150091.1	PREDICTED: nicotinamide N-methyltransferase [Pan troglodytes]	42.4	0.52	0.0004	0.24	33.9	0.35	0.15	0.26
XP_009453102.1	PREDICTED: putative methyltransferase KIAA1456 homolog isoform X1 [Pan troglodytes]	39.7	0.41	0.004	0.24	NA	NA	NA	NA
XP_009453103.1	PREDICTED: putative methyltransferase KIAA1456 homolog isoform X2 [Pan troglodytes]	39.7	0.41	0.004	0.24	NA	NA	NA	NA
XP_009453105.1	PREDICTED: putative methyltransferase KIAA1456 homolog isoform X3 [Pan troglodytes]	39.3	0.41	0.005	0.24	NA	NA	NA	NA
XP_001152216.1	PREDICTED: methyltransferase-like protein 7A [Pan troglodytes]	38.1	0.49	0.01	0.23	42.4	0.45	0.0003	0.26
XP_001170489.3	PREDICTED: LOW QUALITY PROTEIN: methyltransferase-like protein 7B [Pan troglodytes]	37.7	0.38	0.014	0.23	NA	NA	NA	NA
XP_511459.2	PREDICTED: phenylethanolamine N-methyltransferase [Pan troglodytes]	37	0.11	0.021	0.42	NA	NA	NA	NA
XP_003950167.1	PREDICTED: LOW QUALITY PROTEIN: hemK methyltransferase family member 1 [Pan troglodytes]	34.7	0.15	0.13	0.35	NA	NA	NA	NA
XP_009457417.1	PREDICTED: arsenite methyltransferase isoform X3 [Pan troglodytes]	33.1	0.38	0.48	0.25	NA	NA	NA	NA
XP_508007.2	PREDICTED: arsenite methyltransferase isoform X2 [Pan troglodytes]	33.1	0.38	0.5	0.25	NA	NA	NA	NA

## Sheet: M. musculus
		Hits from Trm140 BLASTp				Hits from Trm141 BLASTp
Accession	Description	Total.score	Query.cover	E.value	Ident	Total.score	Query.cover	E.value	Ident
NP_766155.3	methyltransferase-like protein 2 [Mus musculus]	228	0.91	4e-70	0.38	126	0.76	1e-32	0.37
BAE31989.1	unnamed protein product [Mus musculus]	227	0.91	5e-70	0.38	125	0.76	2e-32	0.37
AAH89591.1	Methyltransferase like 2 [Mus musculus]	225	0.91	3e-69	0.38	165	0.88	1e-31	0.37
EDL34231.1	methyltransferase like 2, isoform CRA_b [Mus musculus]	245	0.71	5e-62	0.52	168	0.88	5e-33	0.37
EDL34230.1	methyltransferase like 2, isoform CRA_a [Mus musculus]	194	0.59	1e-59	0.51	119	0.73	1e-31	0.37
XP_006533777.1	PREDICTED: methyltransferase-like protein 2 isoform X1 [Mus musculus]	192	0.8	8e-57	0.37	155	0.74	3e-28	0.4
ABB54393.1	tension induced/inhibited protein 5 [Mus musculus]	189	0.91	4e-56	0.39	108	0.76	1e-26	0.35
NP_001103982.1	methyltransferase-like protein 8 isoform b [Mus musculus]	188	0.91	9e-56	0.39	108	0.76	2e-26	0.35
NP_080183.1	methyltransferase-like protein 6 [Mus musculus]	186	0.74	3e-55	0.41	195	0.97	1e-59	0.45
XP_011243455.1	PREDICTED: methyltransferase-like protein 6 isoform X2 [Mus musculus]	185	0.74	1e-54	0.41	195	0.97	5e-59	0.45
ABB54392.1	tension induced/inhibited protein 4 [Mus musculus]	178	0.91	3e-51	0.35	108	0.76	2e-26	0.35
XP_011243457.1	PREDICTED: methyltransferase-like protein 6 isoform X4 [Mus musculus]	171	0.6	2e-50	0.44	175	0.79	2e-52	0.48
XP_006519497.1	PREDICTED: methyltransferase-like protein 6 isoform X5 [Mus musculus]	171	0.6	8e-50	0.44	173	0.8	2e-51	0.47
BAC37165.1	unnamed protein product [Mus musculus]	169	0.6	1e-49	0.44	173	0.78	7e-52	0.48
XP_011243456.1	PREDICTED: methyltransferase-like protein 6 isoform X3 [Mus musculus]	170	0.6	1e-49	0.44	172	0.78	2e-51	0.48
NP_663499.2	methyltransferase-like protein 8 isoform a [Mus musculus]	173	0.91	3e-49	0.34	108	0.76	2e-26	0.35
EDL24810.1	methyltransferase like 6, isoform CRA_b [Mus musculus]	169	0.6	6e-49	0.44	174	0.78	2e-51	0.48
EDL27072.1	methyltransferase like 8, isoform CRA_a [Mus musculus]	170	0.85	8e-49	0.35	108	0.76	1e-26	0.35
AAH57960.1	Mettl8 protein [Mus musculus]	165	0.6	7e-47	0.46	108	0.76	1e-26	0.35
XP_006533778.1	PREDICTED: methyltransferase-like protein 2 isoform X2 [Mus musculus]	159	0.7	1e-44	0.35	107	0.47	4e-26	0.44
AAZ04167.1	tension induced/inhibited protein 3 [Mus musculus]	131	0.75	3e-34	0.32	129	0.73	1e-19	0.37
XP_006519499.1	PREDICTED: methyltransferase-like protein 6 isoform X6 [Mus musculus]	126	0.74	5e-33	0.34	124	0.97	4e-33	0.34
BAC27107.1	unnamed protein product [Mus musculus]	117	0.32	3e-31	0.57	49.7	0.41	5e-07	0.31
XP_006519500.1	PREDICTED: methyltransferase-like protein 6 isoform X7 [Mus musculus]	117	0.44	3e-30	0.4	138	0.55	1e-38	0.52
BAC31326.1	unnamed protein product [Mus musculus]	79.7	0.34	8e-17	0.38	39.3	0.17	0.006	0.41
AAZ04166.1	tension induced/inhibited protein 1 [Mus musculus]	79	0.34	1e-16	0.38	38.9	0.18	0.008	0.4
XP_011237745.1	PREDICTED: methyltransferase-like protein 8 isoform X3 [Mus musculus]	114	0.35	1e-16	0.38	72.4	0.24	0.003	0.41
XP_006499259.1	PREDICTED: methyltransferase-like protein 8 isoform X2 [Mus musculus]	114	0.43	2e-16	0.38	72.4	0.24	0.005	0.41
EDL27075.1	methyltransferase like 8, isoform CRA_d [Mus musculus]	79	0.34	3e-16	0.38	39.7	0.17	0.005	0.41
A2AUU0.2	RecName: Full=Methyltransferase-like protein 8; AltName: Full=Tension-induced/inhibited protein	130	0.58	4e-16	0.38	106	0.42	8e-12	0.44
EDL27074.1	methyltransferase like 8, isoform CRA_c [Mus musculus]	79.3	0.32	7e-16	0.39	105	0.41	2e-11	0.44
BAC30357.1	unnamed protein product [Mus musculus]	58.5	0.43	1e-09	0.29	NA	NA	NA	NA
AAH04636.1	Methyltransferase like 8 [Mus musculus]	107	0.57	2e-07	0.34	106	0.41	5e-12	0.44
AAH24898.1	Mettl7b protein [Mus musculus]	43.9	0.54	0.0002	0.23	NA	NA	NA	NA
NP_082129.2	methyltransferase-like protein 7B precursor [Mus musculus]	43.9	0.54	0.0003	0.23	NA	NA	NA	NA
XP_006509946.1	PREDICTED: alkylated DNA repair protein alkB homolog 8 isoform X4 [Mus musculus]	43.5	0.48	0.0007	0.23	NA	NA	NA	NA
BAC38223.1	unnamed protein product [Mus musculus]	43.1	0.48	0.0008	0.23	NA	NA	NA	NA
BAE36007.1	unnamed protein product [Mus musculus]	42.7	0.48	0.001	0.23	NA	NA	NA	NA
NP_080579.1	alkylated DNA repair protein alkB homolog 8 [Mus musculus]	42.7	0.48	0.001	0.23	NA	NA	NA	NA
XP_006509942.1	PREDICTED: alkylated DNA repair protein alkB homolog 8 isoform X2 [Mus musculus]	43.1	0.48	0.001	0.23	NA	NA	NA	NA
XP_006509944.1	PREDICTED: alkylated DNA repair protein alkB homolog 8 isoform X3 [Mus musculus]	43.1	0.48	0.001	0.23	NA	NA	NA	NA
XP_006527298.1	PREDICTED: arsenite methyltransferase isoform X1 [Mus musculus]	41.2	0.38	0.003	0.27	NA	NA	NA	NA
AAF00618.1	methyltransferase [Mus musculus]	40.8	0.38	0.004	0.27	NA	NA	NA	NA
NP_065602.2	arsenite methyltransferase [Mus musculus]	40.8	0.38	0.004	0.27	NA	NA	NA	NA
NP_955771.2	methyltransferase like 7A2 [Mus musculus]	39.3	0.49	0.009	0.24	43.9	0.44	0.0002	0.29
XP_006521453.1	PREDICTED: methyltransferase-like protein 7A isoform X3 [Mus musculus]	38.9	0.42	0.011	0.26	44.7	0.44	0.0001	0.28
EDL42017.1	arsenic (+3 oxidation state) methyltransferase, isoform CRA_b [Mus musculus]	39.3	0.38	0.013	0.26	NA	NA	NA	NA
EDL04099.1	mCG20149, isoform CRA_e [Mus musculus]	38.5	0.42	0.014	0.26	44.3	0.44	0.0001	0.28
XP_006521452.1	PREDICTED: methyltransferase-like protein 7A isoform X1 [Mus musculus]	38.5	0.42	0.018	0.26	44.3	0.44	0.0001	0.28
2I62_A	Chain A, Mouse Nicotinamide N-methyltransferase	38.1	0.52	0.024	0.25	NA	NA	NA	NA
NP_001074940.1	UbiE3 protein [Mus musculus]	38.1	0.54	0.024	0.24	45.1	0.44	9e-05	0.29
NP_035054.1	nicotinamide N-methyltransferase isoform 1 [Mus musculus]	38.1	0.52	0.024	0.25	NA	NA	NA	NA
NP_081610.2	methyltransferase-like protein 7A [Mus musculus]	37.7	0.4	0.033	0.26	43.5	0.44	0.0003	0.28
CAD60206.1	AAM-B protein [Mus musculus]	37.4	0.4	0.037	0.26	43.5	0.44	0.0003	0.28
1903270A	phenylethanolamine N-methyltransferase	37.4	0.14	0.048	0.38	NA	NA	NA	NA
NP_032916.1	phenylethanolamine N-methyltransferase [Mus musculus]	37.4	0.14	0.05	0.38	NA	NA	NA	NA
BAE92118.1	UbiE1 [Mus musculus]	37	0.4	0.054	0.26	43.1	0.44	0.0004	0.3
EDL35470.1	RIKEN cDNA 6430573F11, isoform CRA_b [Mus musculus]	36.2	0.45	0.072	0.21	NA	NA	NA	NA
BAB24553.1	unnamed protein product [Mus musculus]	35	0.17	0.11	0.32	NA	NA	NA	NA
NP_795926.2	probable tRNA methyltransferase 9-like protein [Mus musculus]	35.8	0.41	0.19	0.21	NA	NA	NA	NA
EDL35469.1	RIKEN cDNA 6430573F11, isoform CRA_a [Mus musculus]	35.8	0.41	0.2	0.21	NA	NA	NA	NA
AAH87960.1	Glycine N-methyltransferase [Mus musculus]	34.3	0.48	0.43	0.22	NA	NA	NA	NA
1R8X_A	Chain A, Crystal Structure Of Mouse Glycine N-Methyltransferase (Tetragonal Form)	34.3	0.48	0.49	0.22	NA	NA	NA	NA
NP_034451.1	glycine N-methyltransferase [Mus musculus]	34.3	0.48	0.52	0.22	NA	NA	NA	NA
BAD06948.1	NA	NA	NA	NA	NA	37	0.44	0.039	0.27
EDL04092.1	NA	NA	NA	NA	NA	47.4	0.72	2e-05	0.25
EDL04097.1	NA	NA	NA	NA	NA	35.4	0.4	0.048	0.3
XP_011244014.1	NA	NA	NA	NA	NA	35.8	0.4	0.086	0.28

## Sheet: G. gallus
		Hits from Trm140 BLASTp				Hits from Trm141 BLASTp
Accession	Description	Total.score	Query.cover	E.value	Ident	Total.score	Query.cover	E.value	Ident
NP_001006329.1	methyltransferase-like protein 2 [Gallus gallus]	214	0.91	7e-66	0.39	164	0.89	3e-31	0.36
XP_004942797.1	PREDICTED: methyltransferase like 8 isoform X6 [Gallus gallus]	210	0.98	1e-63	0.36	130	0.94	2e-34	0.33
XP_422001.4	PREDICTED: methyltransferase like 8 isoform X4 [Gallus gallus]	261	0.98	6e-58	0.43	172	0.94	3e-34	0.34
XP_004942796.1	PREDICTED: methyltransferase like 8 isoform X5 [Gallus gallus]	261	0.98	1e-57	0.43	172	0.94	3e-34	0.33
XP_001235215.1	PREDICTED: methyltransferase like 6 isoformX1 [Gallus gallus]	189	0.74	5e-57	0.43	197	0.97	4e-61	0.46
XP_004939494.1	PREDICTED: methyltransferase like 6 isoform X6 [Gallus gallus]	170	0.61	4e-50	0.44	176	0.82	3e-53	0.48
XP_004942798.1	PREDICTED: methyltransferase like 8 isoform X7 [Gallus gallus]	218	0.83	3e-42	0.4	155	0.76	2e-28	0.35
XP_418781.2	PREDICTED: methyltransferase like 6 isoformX3 [Gallus gallus]	133	0.74	3e-36	0.34	128	0.97	7e-35	0.35
XP_004938884.1	PREDICTED: alkylated DNA repair protein alkB homolog 8 isoform X9 [Gallus gallus]	41.6	0.48	0.0008	0.26	NA	NA	NA	NA
XP_004938886.1	PREDICTED: alkylated DNA repair protein alkB homolog 8 isoform X11 [Gallus gallus]	41.6	0.48	0.0008	0.26	NA	NA	NA	NA
XP_417166.3	PREDICTED: alkylated DNA repair protein alkB homolog 8 isoform X7 [Gallus gallus]	41.6	0.48	0.0009	0.26	NA	NA	NA	NA
XP_004938883.1	PREDICTED: alkylated DNA repair protein alkB homolog 8 isoform X8 [Gallus gallus]	41.2	0.39	0.001	0.29	NA	NA	NA	NA
XP_004938885.1	PREDICTED: alkylated DNA repair protein alkB homolog 8 isoform X10 [Gallus gallus]	41.6	0.48	0.001	0.26	NA	NA	NA	NA
XP_421735.3	PREDICTED: arsenite methyltransferase isoform X3 [Gallus gallus]	39.7	0.6	0.003	0.23	NA	NA	NA	NA
XP_004942311.1	PREDICTED: arsenite methyltransferase isoform X5 [Gallus gallus]	38.9	0.6	0.006	0.23	30.4	0.5	2	0.22
XP_004942310.1	PREDICTED: arsenite methyltransferase isoform X4 [Gallus gallus]	38.5	0.6	0.009	0.23	NA	NA	NA	NA
XP_419132.1	PREDICTED: mRNA cap guanine-N7 methyltransferase isoform X2 [Gallus gallus]	37.7	0.53	0.013	0.23	NA	NA	NA	NA
XP_414261.2	PREDICTED: hemK methyltransferase family member 1 isoform X3 [Gallus gallus]	36.2	0.13	0.035	0.4	32.7	0.34	0.33	0.25
XP_003642859.1	PREDICTED: phenylethanolamine N-methyltransferase isoform X1 [Gallus gallus]	34.7	0.25	0.1	0.28	NA	NA	NA	NA
XP_424479.2	PREDICTED: LOW QUALITY PROTEIN: methyltransferase like 7A [Gallus gallus]	33.5	0.37	0.19	0.26	37.4	0.54	0.008	0.23
XP_004935414.1	PREDICTED: pleckstrin homology domain-containing family H member 2 isoform X6 [Gallus gallus]	34.3	0.17	0.2	0.33	NA	NA	NA	NA
XP_004935415.1	PREDICTED: pleckstrin homology domain-containing family H member 2 isoform X7 [Gallus gallus]	34.3	0.17	0.2	0.33	NA	NA	NA	NA
XP_419455.2	PREDICTED: pleckstrin homology domain-containing family H member 2 isoform X5 [Gallus gallus]	34.3	0.17	0.21	0.33	NA	NA	NA	NA
XP_426425.2	PREDICTED: rho-related GTP-binding protein RhoV [Gallus gallus]	32.7	0.2	0.33	0.3	NA	NA	NA	NA
XP_004944680.1	PREDICTED: coiled-coil domain-containing protein 36 isoform X3 [Gallus gallus]	31.6	0.12	0.88	0.44	NA	NA	NA	NA
NP_001026241.1	NA	NA	NA	NA	NA	33.1	0.43	0.24	0.32

## Sheet: D. rerio
		Hits from Trm140 BLASTp				Hits from Trm141 BLASTp
Accession	Description	Total.score	Query.cover	E.value	Ident	Total.score	Query.cover	E.value	Ident
A8KBL7.1	RecName: Full=Methyltransferase-like protein 2-A	259	0.91	3e-83	0.43	147	0.95	4e-41	0.35
NP_001017902.1	methyltransferase-like protein 2-A [Danio rerio]	254	0.91	2e-81	0.42	149	0.95	8e-42	0.35
NP_001007337.1	methyltransferase-like protein 8 [Danio rerio]	238	0.91	3e-75	0.39	134	0.94	5e-36	0.31
AAH45969.1	Zgc:56175 [Danio rerio]	186	0.75	2e-55	0.4	192	0.97	8e-59	0.43
NP_956497.2	methyltransferase-like protein 6 [Danio rerio]	185	0.75	3e-55	0.4	192	0.97	1e-58	0.43
AAI51873.1	Zgc:110598 protein [Danio rerio]	74.7	0.43	1e-15	0.32	57.4	0.15	9e-10	0.63
NP_001073508.1	methyltransferase like 7A precursor [Danio rerio]	48.9	0.48	3e-06	0.26	40.4	0.47	0.001	0.28
NP_001070105.1	phosphoethanolamine methyltransferase [Danio rerio]	86.3	0.41	5e-06	0.29	39.3	0.74	0.004	0.23
XP_697545.2	PREDICTED: methyltransferase-like protein 7A [Danio rerio]	48.1	0.49	5e-06	0.28	36.6	0.47	0.022	0.27
XP_697500.2	PREDICTED: methyltransferase-like protein 7A [Danio rerio]	42.7	0.48	0.0003	0.24	40	0.47	0.002	0.28
NP_001038465.1	mRNA cap guanine-N7 methyltransferase [Danio rerio]	35.8	0.48	0.077	0.21	NA	NA	NA	NA
AAI34974.1	Si:ch211-105d11.3 [Danio rerio]	35.4	0.48	0.095	0.21	NA	NA	NA	NA
NP_001107891.1	hemK methyltransferase family member 1 [Danio rerio]	33.9	0.19	0.31	0.33	NA	NA	NA	NA
XP_005168873.1	PREDICTED: protein arginine N-methyltransferase 3 isoform X2 [Danio rerio]	32.3	0.15	0.97	0.37	NA	NA	NA	NA
XP_005172345.1	NA	NA	NA	NA	NA	43.9	0.33	9e-05	0.27
NP_001018613.1	NA	NA	NA	NA	NA	43.5	0.33	0.0001	0.27
Q501S4.2	NA	NA	NA	NA	NA	43.5	0.33	0.0001	0.27
NP_001074147.1	NA	NA	NA	NA	NA	32.7	0.33	0.48	0.3
NP_001303302.1	NA	NA	NA	NA	NA	33.1	0.33	0.56	0.3

## Sheet: X. laevis
		Hits from Trm140 BLASTp				Hits from Trm141 BLASTp
Accession	Description	Total.score	Query.cover	E.value	Ident	Total.score	Query.cover	E.value	Ident
AAH89143.1	LOC733149 protein [Xenopus laevis]	249	0.91	3e-80	0.4	149	0.92	1e-42	0.36
AAI29792.1	LOC100036988 protein [Xenopus laevis]	188	0.74	3e-57	0.42	186	0.97	4e-57	0.42
AAI06440.1	LOC733347 protein [Xenopus laevis]	182	0.74	1e-54	0.41	183	0.97	1e-55	0.42
AAI22481.1	LOC733347 protein [Xenopus laevis]	182	0.74	3e-54	0.41	183	0.97	2e-55	0.42
NP_001085905.1	methyltransferase like 7A [Xenopus laevis]	43.5	0.5	4e-05	0.27	37.4	0.44	0.003	0.26
NP_001088746.1	uncharacterized protein LOC496010 [Xenopus laevis]	43.1	0.46	5e-05	0.26	38.1	0.46	0.002	0.28
AAH84775.1	LOC495315 protein [Xenopus laevis]	38.9	0.41	0.001	0.24	NA	NA	NA	NA
NP_001079865.1	NA	NA	NA	NA	NA	31.6	0.2	0.21	0.31
NP_001087172.1	NA	NA	NA	NA	NA	74.3	0.78	0.004	0.24
NP_001088913.1	NA	NA	NA	NA	NA	33.5	0.47	0.05	0.24

## Sheet: D. melanogaster
		Hits from Trm140 BLASTp				Hits from Trm141 BLASTp
Accession	Description	Total.score	Query.cover	E.value	Ident	Total.score	Query.cover	E.value	Ident
NP_728647.2	methyltransferase-like, isoform A [Drosophila melanogaster]	253	0.91	2e-81	0.44	154	0.99	3e-44	0.37
NP_647636.3	methyltransferase-like, isoform B [Drosophila melanogaster]	247	0.91	4e-79	0.43	154	0.99	4e-44	0.37
NP_001097360.1	uncharacterized protein Dmel_CG34195 [Drosophila melanogaster]	173	0.82	5e-51	0.39	169	0.97	4e-50	0.41
NP_650223.1	glycine N-methyltransferase [Drosophila melanogaster]	37	0.4	0.021	0.25	NA	NA	NA	NA
BAC98836.1	juvenile hormone acid methyltransferase [Drosophila melanogaster]	34.7	0.34	0.12	0.24	NA	NA	NA	NA
NP_611690.2	NA	NA	NA	NA	NA	31.6	0.4	0.99	0.26

## Sheet: C. elegans
		Hits from Trm140 BLASTp				Hits from Trm141 BLASTp
Accession	Description	Total.score	Query.cover	E.value	Ident	Total.score	Query.cover	E.value	Ident
NP_001040827.1	Uncharacterized protein CELE_Y53F4B.42 [Caenorhabditis elegans]	239	0.91	2e-76	0.45	147	0.89	1e-41	0.37
NP_497790.2	Uncharacterized protein CELE_ZK1058.5 [Caenorhabditis elegans]	143	0.72	4e-40	0.36	143	0.96	2e-40	0.36
NP_500168.2	PRotein arginine MethylTransferase [Caenorhabditis elegans]	42.4	0.48	0.0002	0.26	NA	NA	NA	NA
NP_504052.1	Uncharacterized protein CELE_R08F11.4 [Caenorhabditis elegans]	34.3	0.44	0.087	0.24	NA	NA	NA	NA
NP_499956.1	PRotein arginine MethylTransferase [Caenorhabditis elegans]	31.2	0.1	0.54	0.4	NA	NA	NA	NA
NP_503823.2	Uncharacterized protein CELE_K12D9.1 [Caenorhabditis elegans]	31.2	0.37	0.78	0.28	NA	NA	NA	NA
NP_494209.2	MethylTransferase modifying glutamine (Q) [Caenorhabditis elegans]	30.8	0.26	0.8	0.29	NA	NA	NA	NA
NP_508715.1	Uncharacterized protein CELE_F20B6.6 [Caenorhabditis elegans]	30	0.22	1.2	0.24	NA	NA	NA	NA
NP_496061.2	NA	NA	NA	NA	NA	37.4	0.16	0.006	0.46
NP_510703.2	NA	NA	NA	NA	NA	30	0.19	0.66	0.4

## Sheet: Budding yeasts
		Hits from Trm140 BLASTp				Hits from Trm141 BLASTp
Accession	Description	Total.score	Query.cover	E.value	Ident	Total.score	Query.cover	E.value	Ident
XP_504365.1	YALI0E24717p [Yarrowia lipolytica]	345	0.95	7e-116	0.55	150	0.97	3e-41	0.35
CDO56568.1	similar to Saccharomyces cerevisiae YOR239W ABP140 AdoMet-dependent tRNA methyltransferase and actin binding protein [Geotrichum candidum]	332	0.91	3e-111	0.54	144	0.97	5e-39	0.35
XP_002493892.1	Nonessential protein that binds actin filaments and localizes to actin patches and cables [Komagataella phaffii GS115]	328	0.91	8e-110	0.55	136	0.93	3e-36	0.35
CDK24737.1	unnamed protein product [Kuraishia capsulata CBS 1993]	323	0.91	1e-107	0.54	139	0.96	3e-37	0.36
CEP25053.1	unnamed protein product [Cyberlindnera jadinii]	320	0.9	7e-107	0.54	145	0.95	8e-40	0.35
CEP60123.1	LALA0S01e03554g1_1 [Lachancea lanzarotensis]	327	0.99	9e-106	0.51	137	0.97	1e-35	0.33
CUS20411.1	LAQU0S01e05996g1_1 [Lachancea quebecensis]	325	0.91	4e-105	0.52	142	0.96	2e-37	0.34
CDF91042.1	ZYBA0S09-03510g1_1 [Zygosaccharomyces bailii CLIB 213]	317	0.91	6e-105	0.53	141	0.93	4e-38	0.36
CDH08769.1	related to ABP140-Actin filament-binding protein [Zygosaccharomyces bailii ISA1307]	324	0.91	6e-105	0.54	142	0.93	2e-37	0.36
XP_003685194.1	hypothetical protein TPHA_0D01190 [Tetrapisispora phaffii CBS 4417]	317	0.91	8e-104	0.53	146	0.96	2e-39	0.36
KGK38387.1	hypothetical protein JL09_g2437 [Pichia kudriavzevii]	312	0.91	3e-103	0.52	144	0.96	2e-39	0.36
BAP70201.1	adoMet MTases super family [Kluyveromyces marxianus]	314	0.91	6e-103	0.52	153	0.93	5e-42	0.38
XP_013935216.1	putative methyltransferase [Ogataea parapolymorpha DL-1]	309	0.91	3e-102	0.53	138	0.96	3e-37	0.34
AEY95647.1	FACR130Wp [Eremothecium gossypii FDAG1]	317	0.9	4e-102	0.53	142	0.93	3e-37	0.35
NP_983532.2	ACR130Wp [Eremothecium gossypii ATCC 10895]	317	0.9	4e-102	0.53	142	0.93	3e-37	0.35
XP_011275177.1	Methyltransferase-like protein 2 [Wickerhamomyces ciferrii]	309	0.91	5e-102	0.52	150	0.97	2e-41	0.37
XP_447869.1	hypothetical protein [Candida glabrata CBS 138]	315	0.9	6e-102	0.54	140	0.96	1e-36	0.35
CDR44340.1	CYFA0S14e01992g1_1 [Cyberlindnera fabianii]	308	0.9	7e-102	0.52	151	0.96	5e-42	0.36
XP_003679154.1	hypothetical protein TDEL_0A06110 [Torulaspora delbrueckii]	315	0.91	1e-101	0.53	149	0.96	1e-39	0.35
S67133	probable membrane protein YOR240w - yeast (Saccharomyces cerevisiae)	309	0.9	1e-101	0.52	141	0.92	7e-38	0.35
AJT92649.1	Abp140p [Saccharomyces cerevisiae YJM1252]	316	0.9	3e-101	0.53	138	0.93	6e-36	0.35
AJP41751.1	Abp140p [Saccharomyces cerevisiae YJM1078]	316	0.9	4e-101	0.53	138	0.93	7e-36	0.35
AJT97542.1	Abp140p [Saccharomyces cerevisiae YJM1342]	316	0.9	6e-101	0.52	137	0.93	2e-35	0.36
EEU04836.1	Abp140p [Saccharomyces cerevisiae JAY291]	315	0.9	8e-101	0.52	138	0.93	6e-36	0.35
KOH47748.1	ABP140p AdoMet-dependent tRNA methyltransferase and actin binding protein [Saccharomyces sp. 'boulardii']	315	0.9	9e-101	0.52	138	0.93	9e-36	0.35
BAO38654.2	hypothetical protein KLMA_20196 [Kluyveromyces marxianus DMKU3-1042]	316	0.91	1e-100	0.52	153	0.93	5e-41	0.38
XP_006687782.1	methyltransferase [Candida tenuis ATCC 10573]	305	0.91	1e-100	0.54	146	0.96	4e-40	0.35
XP_003954951.1	hypothetical protein KAFR_0A03810 [Kazachstania africana CBS 2517]	313	0.9	2e-100	0.52	139	0.96	2e-36	0.35
AJT71173.1	Abp140p [Saccharomyces cerevisiae YJM189]	314	0.9	2e-100	0.52	138	0.93	9e-36	0.35
AJT71661.1	Abp140p [Saccharomyces cerevisiae YJM193]	314	0.9	2e-100	0.52	138	0.93	9e-36	0.35
AJT72626.1	Abp140p [Saccharomyces cerevisiae YJM244]	314	0.9	2e-100	0.52	138	0.93	9e-36	0.35
EDN63569.1	actin filament binding protein [Saccharomyces cerevisiae YJM789]	315	0.9	2e-100	0.52	138	0.93	9e-36	0.35
NP_014882.4	Abp140p [Saccharomyces cerevisiae S288c]	314	0.9	2e-100	0.52	138	0.93	9e-36	0.35
AJT72152.1	Abp140p [Saccharomyces cerevisiae YJM195]	315	0.9	2e-100	0.52	138	0.93	1e-35	0.35
AJT79986.1	Abp140p [Saccharomyces cerevisiae YJM627]	315	0.9	2e-100	0.52	138	0.93	1e-35	0.35
AJT94112.1	Abp140p [Saccharomyces cerevisiae YJM1307]	314	0.9	2e-100	0.52	137	0.93	1e-35	0.35
AJT99018.1	Abp140p [Saccharomyces cerevisiae YJM1381]	315	0.9	2e-100	0.52	137	0.93	1e-35	0.35
AJU02435.1	Abp140p [Saccharomyces cerevisiae YJM1399]	314	0.9	2e-100	0.52	137	0.93	1e-35	0.35
AJU03917.1	Abp140p [Saccharomyces cerevisiae YJM1402]	315	0.9	2e-100	0.52	137	0.93	1e-35	0.35
AJU08796.1	Abp140p [Saccharomyces cerevisiae YJM1447]	314	0.9	2e-100	0.52	137	0.93	1e-35	0.35
AJU09273.1	Abp140p [Saccharomyces cerevisiae YJM1450]	315	0.9	2e-100	0.52	138	0.93	1e-35	0.35
GAA26551.1	K7_Abp140p [Saccharomyces cerevisiae Kyokai no. 7]	315	0.9	2e-100	0.52	137	0.93	1e-35	0.35
AJT75074.1	Abp140p [Saccharomyces cerevisiae YJM326]	315	0.9	2e-100	0.52	137	0.93	2e-35	0.35
AJT77043.1	Abp140p [Saccharomyces cerevisiae YJM453]	315	0.9	2e-100	0.52	137	0.93	2e-35	0.35
AJT79488.1	Abp140p [Saccharomyces cerevisiae YJM555]	314	0.9	2e-100	0.52	137	0.93	2e-35	0.35
AJT82438.1	Abp140p [Saccharomyces cerevisiae YJM693]	315	0.9	2e-100	0.52	137	0.93	2e-35	0.35
AJU03418.1	Abp140p [Saccharomyces cerevisiae YJM1401]	315	0.9	2e-100	0.52	137	0.93	2e-35	0.35
AJU05396.1	Abp140p [Saccharomyces cerevisiae YJM1418]	314	0.9	3e-100	0.52	137	0.93	2e-35	0.35
XP_002550326.1	conserved hypothetical protein [Candida tropicalis MYA-3404]	303	0.91	4e-100	0.53	152	0.93	2e-42	0.38
CDO95844.1	unnamed protein product [Kluyveromyces dobzhanskii CBS 2104]	304	0.97	4e-100	0.5	149	0.96	4e-41	0.36
XP_455598.1	hypothetical protein [Kluyveromyces lactis NRRL Y-1140]	304	0.91	7e-100	0.51	148	0.93	2e-40	0.36
XP_001383360.2	hypothetical protein PICST_71233 [Scheffersomyces stipitis CBS 6054]	303	0.91	2e-99	0.52	137	0.96	2e-36	0.35
AJT98528.1	Abp140p [Saccharomyces cerevisiae YJM1356]	312	0.9	2e-99	0.52	138	0.93	9e-36	0.35
XP_003670180.1	hypothetical protein NDAI_0E01210 [Naumovozyma dairenensis CBS 421]	305	0.9	3e-99	0.51	141	0.96	1e-37	0.36
XP_002618265.1	conserved hypothetical protein [Clavispora lusitaniae ATCC 42720]	301	0.91	5e-99	0.52	154	0.97	6e-43	0.38
XP_004200251.1	Piso0_002830 [Millerozyma farinosa CBS 7064]	301	0.91	8e-99	0.51	149	0.93	5e-41	0.36
XP_004199392.1	Piso0_002830 [Millerozyma farinosa CBS 7064]	300	0.91	9e-99	0.51	146	0.93	5e-40	0.36
XP_007372249.1	hypothetical protein SPAPADRAFT_57933 [Spathaspora passalidarum NRRL Y-27907]	300	0.91	1e-98	0.53	145	0.96	9e-40	0.36
AJT73598.1	Abp140p [Saccharomyces cerevisiae YJM270]	310	0.9	1e-98	0.52	133	0.93	4e-34	0.35
EMG46854.1	Methyltransferase-like protein, putative [Candida maltosa Xu316]	296	0.91	3e-97	0.51	149	0.96	5e-41	0.37
XP_003867885.1	Abp140 protein [Candida orthopsilosis Co 90-125]	294	0.91	3e-96	0.51	157	0.93	7e-44	0.39
XP_002416877.1	methyltransferase-like protein, putative [Candida dubliniensis CD36]	293	0.91	3e-96	0.5	144	0.93	2e-39	0.36
XP_457782.2	DEHA2C02354p [Debaryomyces hansenii CBS767]	293	0.91	6e-96	0.52	146	0.96	4e-40	0.36
CCE40583.1	hypothetical protein CPAR2_106180 [Candida parapsilosis]	291	0.91	6e-95	0.51	152	0.96	2e-42	0.39
XP_713770.1	hypothetical protein CaO19.3676 [Candida albicans SC5314]	288	0.91	3e-94	0.51	138	0.93	4e-37	0.36
XP_001526816.1	conserved hypothetical protein [Lodderomyces elongisporus NRRL YB-4239]	287	0.91	1e-93	0.49	147	0.91	4e-40	0.37
KND99990.1	hypothetical protein QG37_02930 [Candida auris]	283	0.91	3e-92	0.49	150	0.97	1e-41	0.38
EDK41769.2	hypothetical protein PGUG_05867 [Meyerozyma guilliermondii ATCC 6260]	283	0.91	5e-92	0.51	126	0.93	1e-32	0.35
CCK67984.1	hypothetical protein KNAG_0A02950 [Kazachstania naganishii CBS 8797]	291	0.98	1e-90	0.45	140	0.93	3e-36	0.35
XP_001482104.1	hypothetical protein PGUG_05867 [Meyerozyma guilliermondii ATCC 6260]	278	0.91	4e-90	0.5	122	0.93	4e-31	0.34
XP_004179512.1	hypothetical protein TBLA_0C01800 [Tetrapisispora blattae CBS 6284]	283	0.81	2e-88	0.53	129	0.81	2e-32	0.36
KKA02385.1	tRNA(Thr) (cytosine(32)-N(3))-methyltransferase [Hanseniaspora uvarum DSM 2768]	266	0.91	1e-85	0.48	129	0.94	2e-33	0.35
CDH14066.1	uncharacterized protein ZBAI_05852 [Zygosaccharomyces bailii ISA1307]	158	0.36	2e-46	0.65	67.8	0.45	5e-13	0.37
EDZ69172.1	YOR239Wp-like protein [Saccharomyces cerevisiae AWRI1631]	157	0.53	1e-44	0.47	81.3	0.35	4e-17	0.42
XP_004178746.1	hypothetical protein TBLA_0B03890 [Tetrapisispora blattae CBS 6284]	121	0.81	3e-29	0.33	NA	NA	NA	NA
XP_002770656.1	DEHA2G17160p [Debaryomyces hansenii CBS767]	50.8	0.49	9e-06	0.29	NA	NA	NA	NA
CDK26184.1	unnamed protein product [Kuraishia capsulata CBS 1993]	50.4	0.5	1e-05	0.29	NA	NA	NA	NA
XP_002420010.1	methyltransferase oms1, mitochondrial precursor (ec 2.1.1.-) (oxa multicopy suppressor 1); mitochondrial methyltransferase, putative [Candida dubliniensis CD36]	41.6	0.39	0.009	0.26	NA	NA	NA	NA
XP_013934904.1	Protein integral to the mitochondrial membrane [Ogataea parapolymorpha DL-1]	38.9	0.36	0.053	0.28	36.6	0.45	0.23	0.26
KGQ96634.1	hypothetical protein MG1_03620 [Candida albicans GC75]	38.5	0.39	0.075	0.26	NA	NA	NA	NA
XP_709941.1	hypothetical protein CaO19.1300 [Candida albicans SC5314]	38.5	0.39	0.075	0.26	NA	NA	NA	NA
XP_712980.1	hypothetical protein CaO19.8880 [Candida albicans SC5314]	38.5	0.39	0.076	0.26	NA	NA	NA	NA
EEQ45122.1	conserved hypothetical protein [Candida albicans WO-1]	38.5	0.39	0.085	0.26	NA	NA	NA	NA
KGQ86616.1	hypothetical protein MEO_03564 [Candida albicans P94015]	38.1	0.39	0.093	0.26	NA	NA	NA	NA
XP_001524561.1	conserved hypothetical protein [Lodderomyces elongisporus NRRL YB-4239]	35.8	0.57	0.53	0.21	NA	NA	NA	NA
GAA25019.1	K7_Ylr137wp [Saccharomyces cerevisiae Kyokai no. 7]	32.7	0.11	5.7	0.42	NA	NA	NA	NA
AJV66792.1	Rkm5p [Saccharomyces cerevisiae YJM1460]	32.7	0.11	5.8	0.42	NA	NA	NA	NA
AJV61476.1	Rkm5p [Saccharomyces cerevisiae YJM1402]	32.7	0.11	5.9	0.42	NA	NA	NA	NA
AJV46210.1	Rkm5p [Saccharomyces cerevisiae YJM1083]	32.3	0.11	6	0.42	NA	NA	NA	NA
C8ZDA6.1	RecName: Full=Ribosomal lysine N-methyltransferase 5	32.3	0.11	6	0.42	NA	NA	NA	NA
AJV62828.1	Rkm5p [Saccharomyces cerevisiae YJM1418]	32.3	0.11	6.1	0.42	NA	NA	NA	NA
AJV65909.1	Rkm5p [Saccharomyces cerevisiae YJM1447]	32.3	0.11	6.1	0.42	NA	NA	NA	NA
AJV60122.1	Rkm5p [Saccharomyces cerevisiae YJM1399]	32.3	0.11	6.2	0.42	NA	NA	NA	NA
E7KFK5.1	RecName: Full=Ribosomal lysine N-methyltransferase 5	32.3	0.11	6.2	0.42	NA	NA	NA	NA
AJV48931.1	Rkm5p [Saccharomyces cerevisiae YJM1208]	32.3	0.11	6.4	0.42	NA	NA	NA	NA
AJV51598.1	Rkm5p [Saccharomyces cerevisiae YJM1273]	32.3	0.11	6.5	0.42	NA	NA	NA	NA
AJV50249.1	Rkm5p [Saccharomyces cerevisiae YJM1248]	32.3	0.11	6.6	0.42	NA	NA	NA	NA
AJV73079.1	Rkm5p [Saccharomyces cerevisiae YJM195]	32.3	0.11	6.8	0.42	NA	NA	NA	NA
AJV57441.1	Rkm5p [Saccharomyces cerevisiae YJM1383]	32.3	0.11	7.2	0.42	NA	NA	NA	NA
AJV52490.1	Rkm5p [Saccharomyces cerevisiae YJM1307]	32.3	0.11	7.3	0.42	NA	NA	NA	NA
XP_001384476.2	NA	NA	NA	NA	NA	40.8	0.43	0.01	0.3
XP_007376974.1	NA	NA	NA	NA	NA	38.9	0.45	0.04	0.27
EMG48346.1	NA	NA	NA	NA	NA	36.6	0.43	0.2	0.25
KHC67642.1	NA	NA	NA	NA	NA	35	0.43	0.62	0.25
XP_002494090.1	NA	NA	NA	NA	NA	34.3	0.45	1.3	0.26
XP_002545541.1	NA	NA	NA	NA	NA	33.9	0.48	1.5	0.23
KGQ98014.1	NA	NA	NA	NA	NA	33.9	0.43	1.6	0.25
CDR46622.1	NA	NA	NA	NA	NA	33.5	0.45	2.1	0.29
CUS24531.1	NA	NA	NA	NA	NA	33.5	0.46	2.1	0.29
EEU05580.1	NA	NA	NA	NA	NA	33.5	0.45	2.1	0.25
KND98062.1	NA	NA	NA	NA	NA	33.1	0.3	2.2	0.3
XP_002616616.1	NA	NA	NA	NA	NA	33.1	0.43	3	0.25
XP_002549026.1	NA	NA	NA	NA	NA	32.7	0.47	3.1	0.23
KGU32216.1	NA	NA	NA	NA	NA	32.7	0.43	3.3	0.24
KHC83775.1	NA	NA	NA	NA	NA	32.7	0.43	3.6	0.23
KGU13272.1	NA	NA	NA	NA	NA	32.7	0.43	3.8	0.23
KGU16601.1	NA	NA	NA	NA	NA	32.7	0.43	3.9	0.23
EDK40526.2	NA	NA	NA	NA	NA	32.3	0.56	4.1	0.22
KHC41034.1	NA	NA	NA	NA	NA	32.7	0.43	4.1	0.23
KHC60332.1	NA	NA	NA	NA	NA	32.3	0.43	4.3	0.23
XP_001482669.1	NA	NA	NA	NA	NA	32.3	0.56	4.3	0.22
KGR17134.1	NA	NA	NA	NA	NA	32.3	0.17	5.3	0.36
KHC89210.1	NA	NA	NA	NA	NA	32.3	0.17	5.4	0.36
XP_002617845.1	NA	NA	NA	NA	NA	32	0.44	5.4	0.27
KHC74325.1	NA	NA	NA	NA	NA	32.3	0.17	5.5	0.36

[truncated: 1 more sheets: Schizosaccharomyces]
